# Supplementary material for: Distinct tumor immune microenvironments in primary and metastatic lesions in gastric cancer patients
Source: PubMed Central journal article supplement (PMC7459099; doi:10.1038/s41598-020-71340-z), 2020-08-31
Supplement: 41598_2020_71340_MOESM1_ESM.pdf [file 41598_2020_71340_MOESM1_ESM.pdf]

## Supplementary material

# Distinct tumor immune microenvironments in primary and metastatic lesions in gastric cancer patients

Seung-Myoung Son<sup>1,2</sup>, Chang Gok Woo<sup>1</sup>, Dae Hoon Kim<sup>3</sup>, Hyo Yung Yun<sup>3,4</sup>, Hongsik Kim<sup>5</sup>, Hee Kyung Kim<sup>5</sup>,  
Yaewon Yang<sup>5</sup>, Jihyun Kwon<sup>5,6</sup>, Minsuk Kwon<sup>7</sup>, Tae-Yong Kim<sup>8</sup>, Hyung-Don Kim<sup>9</sup>, June-Young Koh<sup>10</sup>, Su-Hyung  
Park<sup>10</sup>, Eui-Cheol Shin<sup>10\*</sup>, Hye Sook Han<sup>5,6\*</sup>

<sup>1</sup>Department of Pathology, Chungbuk National University Hospital, Cheongju, Republic of Korea

<sup>2</sup>Department of Pathology, Chungbuk National University College of Medicine, Cheongju, Republic of Korea

<sup>3</sup>Department of Surgery, Chungbuk National University Hospital, Cheongju, Republic of Korea

<sup>4</sup>Department of Surgery, Chungbuk National University College of Medicine, Cheongju, Republic of Korea

<sup>5</sup>Department of Internal Medicine, Chungbuk National University Hospital, Cheongju, Republic of Korea

<sup>6</sup>Department of Internal Medicine, Chungbuk National University College of Medicine, Cheongju, Republic of Korea

<sup>7</sup>Division of Hematology-Oncology, Department of Internal Medicine, Samsung Medical Center, Sungkyunkwan University School of Medicine, Seoul, Republic of Korea

<sup>8</sup>Department of Internal Medicine, Seoul National University Hospital, Seoul National University College of Medicine, Seoul, Republic of Korea

<sup>9</sup>Department of Internal Medicine, Asan Medical Center, University of Ulsan College of Medicine, Seoul, Republic of Korea

<sup>10</sup>Graduate School of Medical Science and Engineering, Korea Advanced Institute of Science and Technology, Daejeon, Republic of Korea

### Contents:

Supplementary Figures 1 – 3

Supplementary Tables 1 – 3

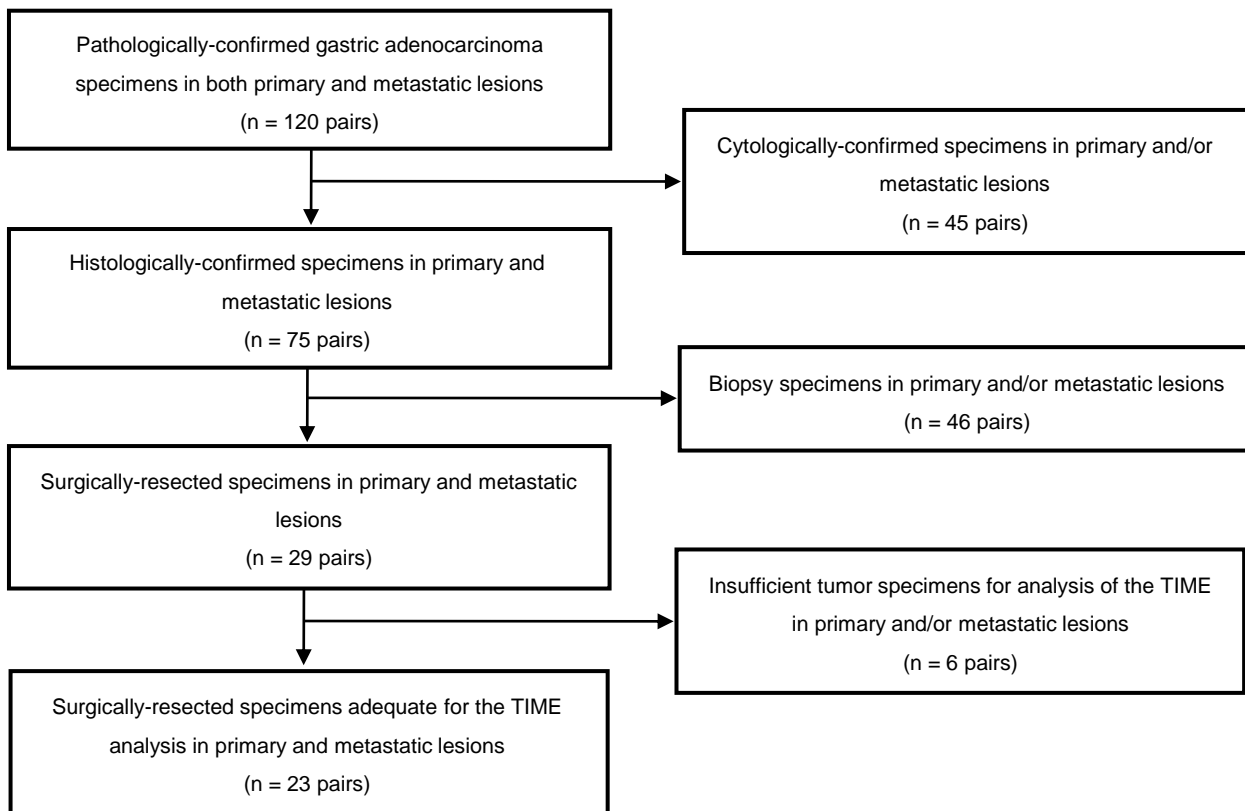

**Supplementary Figure 1. Flow diagram of study inclusion.** TIME, tumor immune microenvironment.

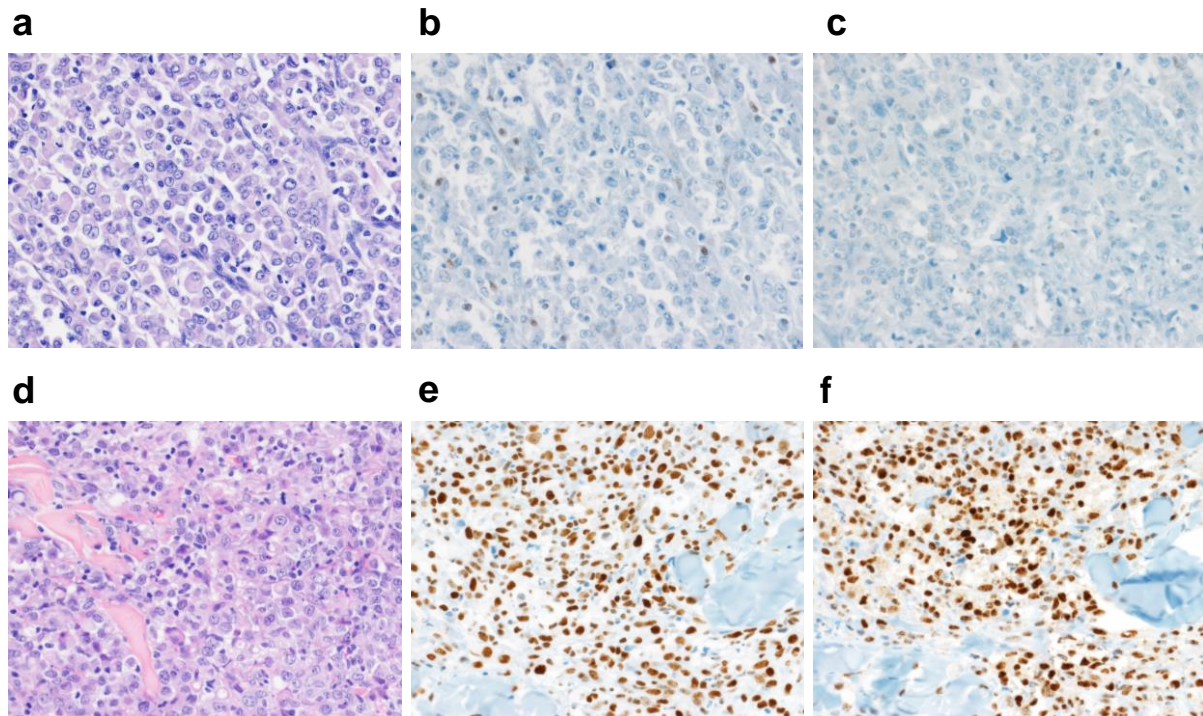

**Supplementary Figure 2.** Pathological features of resected primary gastric cancer and excisional biopsy of the skin metastasis. (a) The primary gastric cancer showing poorly differentiated adenocarcinoma (H&E,  $\times 400$ ) and loss of (b) MLH1 and (c) PMS2 protein expression ( $\times 400$ ). (d) Excisional biopsy of the skin metastatic tumor showing poorly differentiated adenocarcinoma (H&E,  $\times 400$ ), but intact (e) MLH1 and (f) PMS2 protein ( $\times 400$ ).

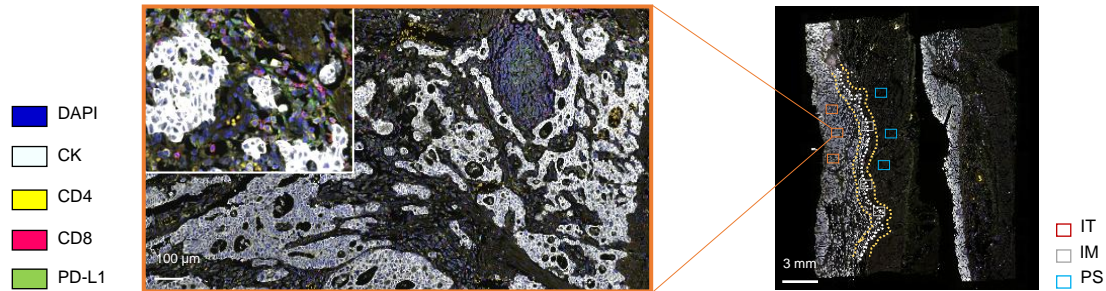

**Supplementary Figure 3. Identification and characterization of T-cell infiltration and PD-L1 expression by OPAL multiplex IHC.** Regions of interest consisted of 3 regions for each tumor specimen and 3 non-overlapping fields per region (one microscopic field,  $925 \times 693 \mu\text{m}$ ). A  $500 \mu\text{m}$  width on each side of the tumor margin (white dotted line) is designated as the invasive margin (IM, yellow dotted line). The intratumoral (IT) region (red) is designated as the tumor parenchyma inside the IM, and a peritumoral stroma (PS) (blue) was designated within the peritumoral region outside the IM. The total cell number in each region was calculated by the sum of the immunoreactive cells in 3 selected fields per region. OPAL multiplex IHC staining for T-cell infiltration and PD-L1 expression consisted of CK (white), CD4 (yellow), CD8 (red), PD-L1 (green) and nuclear DNA (DAPI, blue). PD-L1, programmed death-ligand 1; IHC, immunohistochemistry; CK, cytokeratin.

**Supplementary Table 1.** Comparison of T-cell density and PD-L1 expression between PGC and MGC

|                                        | Density (cells per field) |              |         |                        |             |         |
|----------------------------------------|---------------------------|--------------|---------|------------------------|-------------|---------|
|                                        | IT and IM regions         |              |         | IT, IM, and PS regions |             |         |
|                                        | PGC                       | MGC          | P-value | PGC                    | MGC         | P-value |
| <b>Total (n=23)</b>                    |                           |              |         |                        |             |         |
| T-cell density                         |                           |              |         |                        |             |         |
| CD4 <sup>+</sup>                       | 62.2 ± 60.2               | 44.5 ± 71.0  | 0.200   | 47.5 ± 42.1            | 39.4 ± 49.0 | 0.615   |
| CD8 <sup>+</sup>                       | 79.6 ± 73.1               | 35.5 ± 52.8  | 0.046   | 61.0 ± 51.2            | 28.5 ± 37.5 | 0.039   |
| CD4 <sup>+</sup> and CD8 <sup>+</sup>  | 141.8 ± 120.4             | 80.0 ± 107.0 | 0.095   | 108.5 ± 82.9           | 67.9 ± 73.8 | 0.131   |
| PD-L1 expression                       |                           |              |         |                        |             |         |
| PD-L1 <sup>+</sup>                     | 77.5 ± 154.0              | 6.2 ± 18.6   | 0.010   | 52.7 ± 103.0           | 4.3 ± 12.8  | 0.001   |
| PD-L1 <sup>+</sup> and CK <sup>+</sup> | 58.8 ± 114.7              | 4.5 ± 13.3   | 0.001   | 40.1 ± 76.8            | 3.2 ± 9.2   | 0.001   |
| <b>Simultaneous resection (n=7)</b>    |                           |              |         |                        |             |         |
| T-cell density                         |                           |              |         |                        |             |         |
| CD4 <sup>+</sup>                       | 49.2 ± 62.3               | 26.6 ± 22.0  | 0.398   | 37.0 ± 41.3            | 27.6 ± 20.0 | 0.735   |
| CD8 <sup>+</sup>                       | 91.4 ± 92.8               | 61.2 ± 71.5  | 0.612   | 70.2 ± 64.6            | 51.1 ± 52.3 | 0.612   |
| CD4 <sup>+</sup> and CD8 <sup>+</sup>  | 140.6 ± 151.1             | 87.8 ± 58.9  | 0.612   | 107.2 ± 102.9          | 78.6 ± 66.6 | 0.612   |
| PD-L1 expression                       |                           |              |         |                        |             |         |
| PD-L1 <sup>+</sup>                     | 36.6 ± 42.0               | 2.3 ± 4.0    | 0.043   | 24.8 ± 28.4            | 1.5 ± 2.7   | 0.043   |
| PD-L1 <sup>+</sup> and CK <sup>+</sup> | 21.0 ± 20.0               | 2.0 ± 3.5    | 0.043   | 14.3 ± 13.5            | 1.3 ± 2.4   | 0.043   |
| <b>Staged resection (n=16)</b>         |                           |              |         |                        |             |         |
| T-cell density                         |                           |              |         |                        |             |         |
| CD4 <sup>+</sup>                       | 68.3 ± 60.5               | 52.9 ± 84.3  | 0.363   | 52.4 ± 43.0            | 44.8 ± 57.6 | 0.733   |
| CD8 <sup>+</sup>                       | 74.0 ± 65.0               | 23.5 ± 38.9  | 0.015   | 56.8 ± 43.9            | 18.0 ± 26.0 | 0.008   |
| CD4 <sup>+</sup> and CD8 <sup>+</sup>  | 142.3 ± 109.3             | 76.4 ± 118.1 | 0.078   | 109.2 ± 76.0           | 62.8 ± 78.7 | 0.100   |

|                                                 |               |              |         |              |             |         |
|-------------------------------------------------|---------------|--------------|---------|--------------|-------------|---------|
| PD-L1 expression                                |               |              |         |              |             |         |
| PD-L1 <sup>+</sup>                              | 96.6 ± 183.3  | 8.0 ± 22.4   | 0.011   | 65.7 ± 122.4 | 5.6 ± 15.5  | 0.011   |
| PD-L1 <sup>+</sup> and CK <sup>+</sup>          | 76.5 ± 136.1  | 5.7 ± 16.0   | 0.011   | 52.1 ± 91.0  | 4.0 ± 11.1  | 0.011   |
| No systemic therapy before MGC resection (n=18) | PGC           | MGC          | P-value | PGC          | MGC         | P-value |
| T-cell density                                  |               |              |         |              |             |         |
| CD4 <sup>+</sup>                                | 57.5 ± 61.3   | 40.0 ± 72.6  | 0.286   | 43.7 ± 42.2  | 33.7 ± 49.3 | 0.586   |
| CD8 <sup>+</sup>                                | 83.5 ± 80.4   | 41.5 ± 56.8  | 0.133   | 62.6 ± 55.1  | 33.0 ± 41.3 | 0.133   |
| CD4 <sup>+</sup> and CD8 <sup>+</sup>           | 141.0 ± 131.1 | 81.5 ± 115.6 | 0.199   | 106.3 ± 89.2 | 66.7 ± 80.0 | 0.215   |
| PD-L1 expression                                |               |              |         |              |             |         |
| PD-L1 <sup>+</sup>                              | 87.0 ± 167.9  | 7.3 ± 20.5   | 0.003   | 59.2 ± 112.3 | 5.1 ± 14.1  | 0.003   |
| PD-L1 <sup>+</sup> and CK <sup>+</sup>          | 64.6 ± 124.6  | 5.3 ± 14.6   | 0.003   | 44.0 ± 83.5  | 3.7 ± 10.1  | 0.003   |
| Systemic therapy before MGC resection (n=5)     | PGC           | MGC          | P-value | PGC          | MGC         | P-value |
| T-cell density                                  |               |              |         |              |             |         |
| CD4 <sup>+</sup>                                | 83.7 ± 57.7   | 65.1 ± 68.5  | 0.465   | 64.6 ± 43.1  | 64.8 ± 44.3 | 1.000   |
| CD8 <sup>+</sup>                                | 61.9 ± 17.0   | 8.4 ± 8.0    | 0.068   | 53.9 ± 18.7  | 8.2 ± 3.7   | 0.068   |
| CD4 <sup>+</sup> and CD8 <sup>+</sup>           | 145.6 ± 63.2  | 73.5 ± 65.3  | 0.273   | 118.5 ± 53.8 | 72.9 ± 43.2 | 0.273   |
| PD-L1 expression                                |               |              |         |              |             |         |
| PD-L1 <sup>+</sup>                              | 34.5 ± 57.1   | 1.2 ± 2.2    | 0.273   | 23.6 ± 37.8  | 0.8 ± 1.5   | 0.273   |
| PD-L1 <sup>+</sup> and CK <sup>+</sup>          | 32.8 ± 54.6   | 1.1 ± 2.0    | 0.273   | 22.5 ± 36.2  | 0.8 ± 1.4   | 0.273   |

Data are given as mean ± standard deviation. IT, intratumoral; IM, invasive margin; PS, peritumoral stroma; PGC, primary gastric cancer; MGC, metastatic gastric cancer; PD-L1, programmed death-ligand 1; CK, cytokeratin

**Supplementary Table 2.** Comparison of tumor immune microenvironment types between PGC and MGC

|                                                                 | No. of patients (%) |           |           |
|-----------------------------------------------------------------|---------------------|-----------|-----------|
|                                                                 | PGC                 | MGC       | Total     |
| Types based on CD8 <sup>+</sup> T-cell density and distribution |                     |           |           |
| Inflamed                                                        | 8 (34.8)            | 6 (26.1)  | 14 (30.4) |
| Immune excluded                                                 | 7 (30.4)            | 2 (8.7)   | 9 (19.6)  |
| Immune desert                                                   | 8 (34.8)            | 15 (65.2) | 23 (50.0) |
| Types based on the TIL density and PD-L1 expression             |                     |           |           |
| Type I, Adaptive immune resistance                              | 8 (34.8)            | 0         | 8 (17.4)  |
| Type II, Immunological ignorance                                | 7 (30.4)            | 17 (73.9) | 24 (52.2) |
| Type III, Intrinsic induction                                   | 4 (17.4)            | 1 (4.3)   | 5 (10.9)  |
| Type IV, Immune tolerance                                       | 4 (17.4)            | 5 (21.7)  | 9 (19.6)  |

PGC, primary gastric cancer; MGC, metastatic gastric cancer; TIL, tumor-infiltrating lymphocytes

**Supplementary Table 3.** Genes used in Gene Set Analysis

| Gene set                 | Gene               | Gene set                    | Gene            |
|--------------------------|--------------------|-----------------------------|-----------------|
| Immune checkpoints       | <i>PDCD1</i>       | Immune checkpoint ligands   | <i>CD274</i>    |
|                          | <i>CTLA4</i>       |                             | <i>PDCD1LG2</i> |
|                          | <i>HAVCR2</i>      |                             | <i>CD80</i>     |
|                          | <i>TIGIT</i>       |                             | <i>CD86</i>     |
|                          | <i>LAG3</i>        |                             | <i>LGALS9</i>   |
|                          | <i>BTLA</i>        |                             | <i>PVR</i>      |
|                          | <i>ADORA2A-AS1</i> |                             | <i>CD276</i>    |
|                          | <i>KIR2DL1</i>     |                             | <i>VTCN1</i>    |
|                          | <i>KIR2DL3</i>     |                             | <i>TNFRSF14</i> |
|                          | <i>KIR2DL4</i>     |                             | <i>HLA-A</i>    |
|                          | <i>KIR2DS4</i>     |                             | <i>HLA-B</i>    |
|                          | <i>KIR3DL2</i>     |                             | <i>HLA-C</i>    |
|                          |                    |                             | <i>HLA-DPA1</i> |
|                          | <i>HLA-DPB1</i>    |                             |                 |
|                          | <i>HLA-DQA1</i>    |                             |                 |
|                          | <i>HLA-DQB1</i>    |                             |                 |
|                          | <i>HLA-DRA</i>     |                             |                 |
|                          | <i>HLA-DRB1</i>    |                             |                 |
| Co-stimulatory molecules | <i>CD28</i>        | Co-stimulatory ligands      | <i>CD80</i>     |
|                          | <i>ICOS</i>        |                             | <i>ICOSLG</i>   |
|                          | <i>CD40LG</i>      |                             | <i>CD40</i>     |
|                          | <i>TNFRSF9</i>     |                             | <i>TNFSF9</i>   |
|                          | <i>CD27</i>        |                             | <i>CD70</i>     |
|                          | <i>TNFRSF4</i>     |                             | <i>TNFSF4</i>   |
|                          | <i>TNFRSF18</i>    |                             | <i>CD47</i>     |
|                          | <i>SIRPA</i>       |                             |                 |
| Chemokines               | <i>XCL1</i>        | 18-gene T-cell inflamed GEP | <i>TIGIT</i>    |
|                          | <i>XCL2</i>        |                             | <i>CD27</i>     |
|                          | <i>CX3CL1</i>      |                             | <i>CD8A</i>     |
|                          | <i>CCL1</i>        |                             | <i>PDCD1LG2</i> |
|                          | <i>CCL2</i>        |                             | <i>LAG3</i>     |
|                          | <i>CCL3</i>        |                             | <i>CD274</i>    |
|                          | <i>CCL3L1</i>      |                             | <i>CXCR6</i>    |
|                          | <i>CCL3L3</i>      |                             | <i>CMKLR1</i>   |
|                          | <i>CCL4</i>        |                             | <i>NKG7</i>     |
| <i>CCL4L1</i>            | <i>CCL5</i>        |                             |                 |



---

|               |                 |
|---------------|-----------------|
| <i>CCL4L2</i> | <i>PSMB10</i>   |
| <i>CCL5</i>   | <i>IDO1</i>     |
| <i>CCL7</i>   | <i>CXCL9</i>    |
| <i>CCL8</i>   | <i>HLA-DQA1</i> |
| <i>CCL15</i>  | <i>CD276</i>    |
| <i>CCL11</i>  | <i>STAT1</i>    |
| <i>CCL14</i>  | <i>HLA-DRB1</i> |
| <i>CCL16</i>  | <i>HLA-E</i>    |
| <i>CCL17</i>  |                 |
| <i>CCL18</i>  |                 |
| <i>CCL19</i>  |                 |
| <i>CCL20</i>  |                 |
| <i>CCL21</i>  |                 |
| <i>CCL22</i>  |                 |
| <i>CCL27</i>  |                 |
| <i>CCL28</i>  |                 |
| <i>CXCL1</i>  |                 |
| <i>CXCL2</i>  |                 |
| <i>CXCL3</i>  |                 |
| <i>PF4V1</i>  |                 |
| <i>CXCL5</i>  |                 |
| <i>CXCL6</i>  |                 |
| <i>CXCL10</i> |                 |
| <i>CXCL11</i> |                 |
| <i>CXCL12</i> |                 |
| <i>CXCL13</i> |                 |
| <i>CXCL14</i> |                 |
| <i>CXCL16</i> |                 |
| <i>CXCL17</i> |                 |

---
